# Supplementary material for: Surface restructuring of Cu-based single-atom alloy catalysts under reaction conditions: the essential role of adsorbates
Source: Royal Society of Chemistry journal article supplement (doi:10.1039/c7cp02152f), 2017-01-01
Supplement: c7cp02152f1.pdf [file c7cp02152f1.pdf]

## **Electronic Supplementary Information**

### **Surface Restructuring of Cu-based Single-atom Alloy Catalysts under Reaction Conditions: The Essential Role of Adsorbates**

Kunran Yang and Bo Yang\*

*School of Physical Science and Technology, ShanghaiTech University, 393 Middle  
Huaxia Road, Shanghai 201210, China*

Email: [yangbo1@shanghaitech.edu.cn](mailto:yangbo1@shanghaitech.edu.cn)

**Table S1.** Adsorption energies (in eV) and C-C bond lengths ( $d_{C-C}$ , in Å) of acetylene on different alloy surfaces.

|    | $M_1Cu_3$ |           | $M_2Cu_2$ |           | $M_3Cu_1$ |           | $M_4Cu_0$ |           |
|----|-----------|-----------|-----------|-----------|-----------|-----------|-----------|-----------|
|    | $E_{ad}$  | $d_{C-C}$ | $E_{ad}$  | $d_{C-C}$ | $E_{ad}$  | $d_{C-C}$ | $E_{ad}$  | $d_{C-C}$ |
| Pd | -1.23     | 1.370     | -1.12     | 1.366     | -1.25     | 1.342     | -1.23     | 1.360     |
| Pt | -1.34     | 1.370     | -1.33     | 1.359     | -1.50     | 1.380     | -1.39     | 1.363     |
| Rh | -1.61     | 1.382     | -2.30     | 1.387     | -2.51     | 1.384     | -2.46     | 1.410     |
| Ni | -1.70     | 1.374     | -2.24     | 1.375     | -2.55     | 1.385     | -2.85     | 1.399     |

**Table S2.** Adsorption energies (in eV) and C-C bond lengths ( $d_{C-C}$ , in Å) of ethylene on different alloy surfaces.

|    | $M_1Cu_3$ |           | $M_2Cu_2$ |           | $M_3Cu_1$ |           | $M_4Cu_0$ |           |
|----|-----------|-----------|-----------|-----------|-----------|-----------|-----------|-----------|
|    | $E_{ad}$  | $d_{C-C}$ | $E_{ad}$  | $d_{C-C}$ | $E_{ad}$  | $d_{C-C}$ | $E_{ad}$  | $d_{C-C}$ |
| Pd | -0.53     | 1.389     | -0.50     | 1.388     | -0.49     | 1.389     | -0.47     | 1.388     |
| Pt | -0.60     | 1.411     | -0.60     | 1.473     | -0.52     | 1.475     | -0.51     | 1.471     |
| Rh | -0.97     | 1.411     | -0.91     | 1.413     | -0.95     | 1.441     | -0.92     | 1.411     |
| Ni | -0.71     | 1.407     | -0.77     | 1.434     | -0.96     | 1.446     | -0.95     | 1.447     |

**Table S3.** Energies of different alloy surfaces with an adsorbed hydrogen atom, where the energies of corresponding single atom alloy surfaces were set to zero.

| $E_{x-H}/eV$ | Pd   | Pt   | Rh   | Ni    |
|--------------|------|------|------|-------|
| $M_1Cu_3$    | 0.00 | 0.00 | 0.00 | 0.00  |
| $M_2Cu_2$    | 0.08 | 0.12 | 0.08 | -0.11 |
| $M_3Cu_1$    | 0.21 | 0.49 | 0.17 | -0.21 |

**Table S4.** Adsorption energies of hydrogen atom over different alloy surfaces.

| $E_{\text{ad-H}}/\text{eV}$ | Pd    | Pt    | Rh    | Ni    |
|-----------------------------|-------|-------|-------|-------|
| $\text{M}_1\text{Cu}_3$     | -0.23 | -0.27 | -0.46 | -0.39 |
| $\text{M}_2\text{Cu}_2$     | -0.28 | -0.34 | -0.52 | -0.53 |
| $\text{M}_3\text{Cu}_1$     | -0.36 | -0.25 | -0.57 | -0.67 |

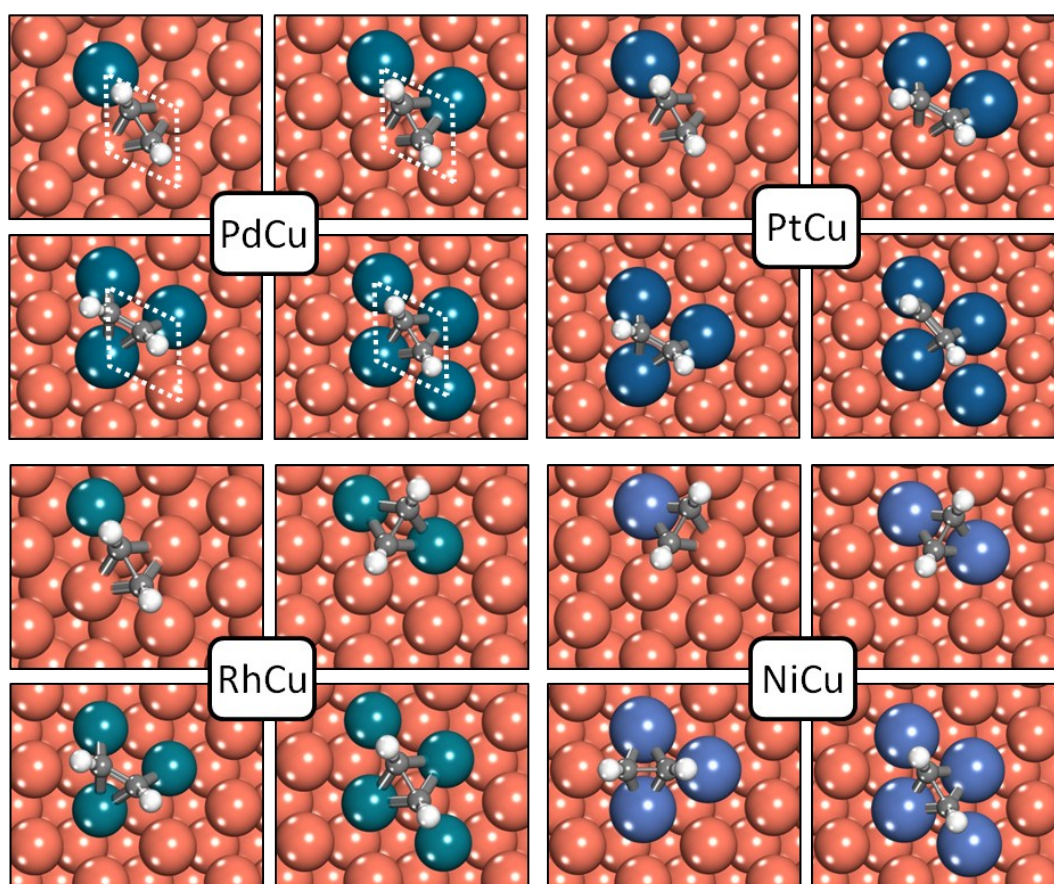

**Figure S1.** The most stable structures of SAA and aggregated-SAA surfaces of PdCu, PtCu, RhCu and NiCu alloys with adsorbed acetylene.

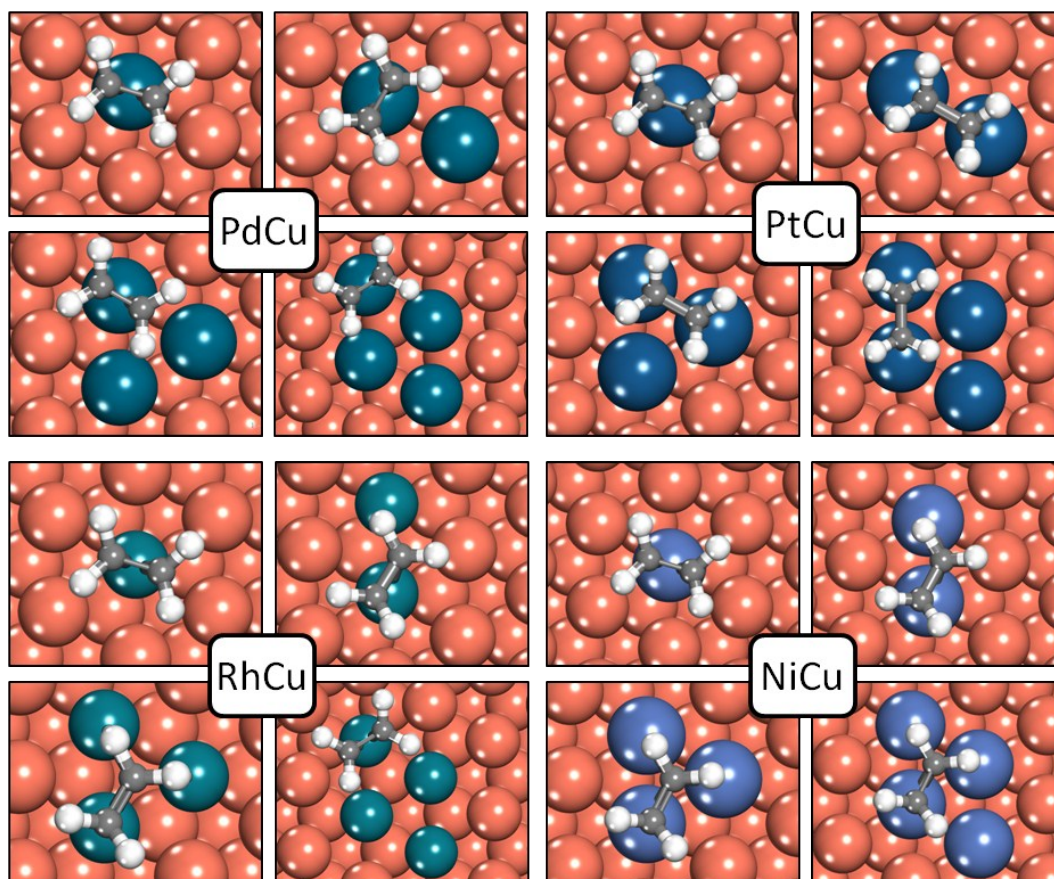

**Figure S2.** The most stable structures of SAA and aggregated-SAA surfaces of PdCu, PtCu, RhCu and NiCu alloys with adsorbed ethylene.
